# Supplementary material for: Picea wilsonii NAC31 and DREB2A Cooperatively Activate ERD1 to Modulate Drought Resistance in Transgenic Arabidopsis
Source: MDPI journal article supplement (doi:10.3390/ijms25042037), 2024-02-07
Supplement: s1 [file s1]

## Supplementary materials

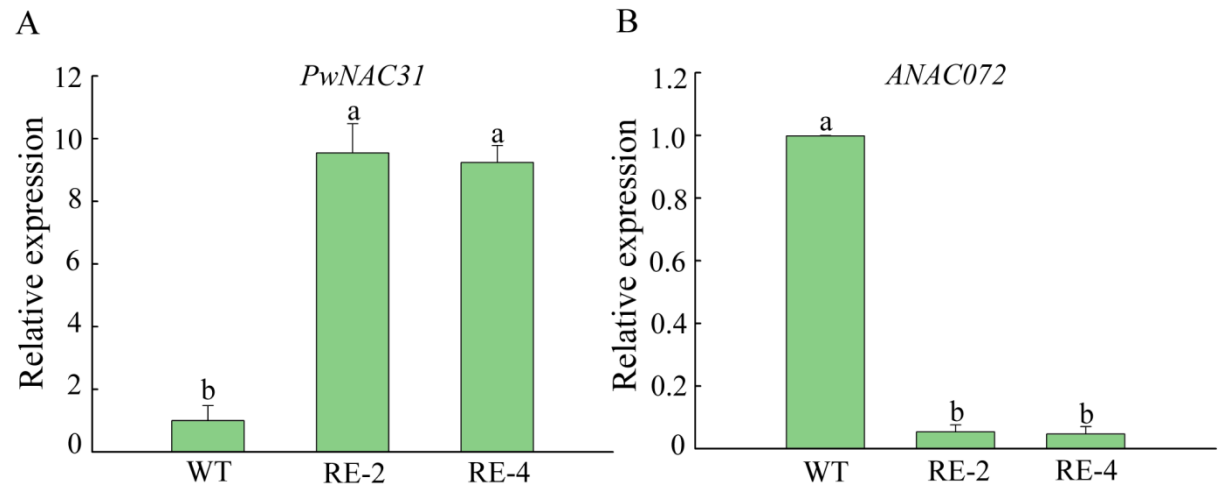

**Figure S1:** Identification of mutant and restore lines in *Arabidopsis*. (A) The expression quantity of *PwNAC31* were examined in T3 transgenic lines and WT *Arabidopsis* seedlings. (B) The expression quantity of *ANAC072* were examined in T3 transgenic lines and WT *Arabidopsis* seedlings.

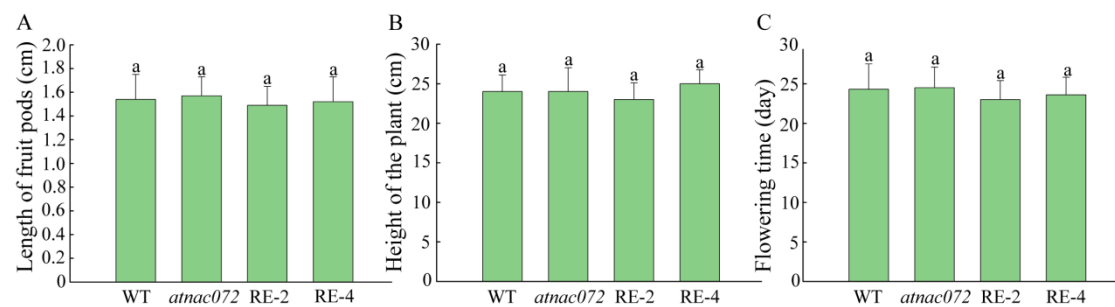

**Figure S2:** The growth condition of mutant and restore lines in *Arabidopsis*. (A) The fruit pods length and (B) plant height of 4-week-old transgenic and wild-type lines were measured under normal growth conditions. (C) Flowering time, examined as number of days required for flowering.

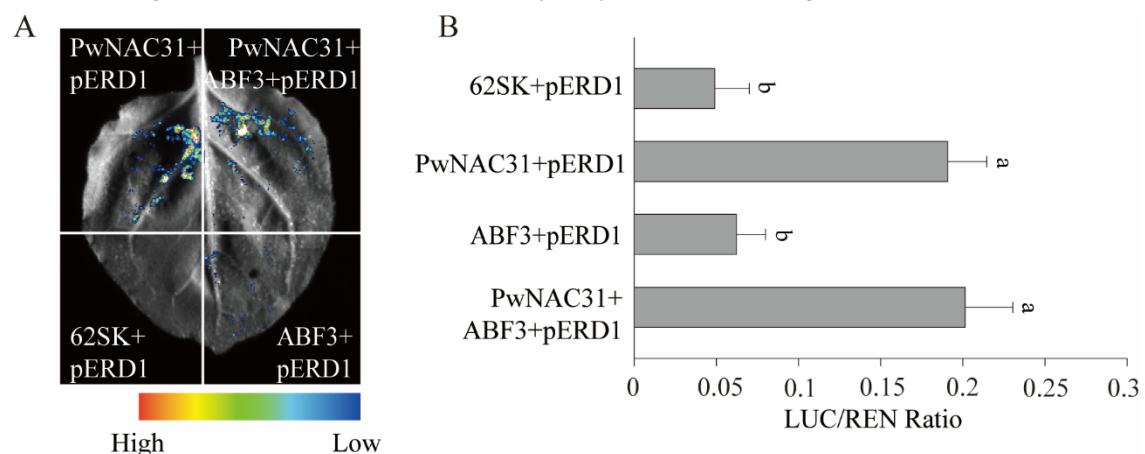

**Figure S3:** Dual-luciferase assay of ABF3 dose not activate the *ERD1* promoter. The left is dual-luciferase imaging, and the right is dual-luciferase activity assay. The error bars indicate ( $\pm$ SD) of three independent replications and the different lowercase letters in Figure D mean significant differences at 5% level treatments.

**Supplementary Table S1. The CDS sequences used in this study.**

| Gene Name | CDS                                                                                                                                                                                                                                                                                                                                                                                                                                                                                                                                                                                                                                                                                                                                                                                                                                                                                                                                                                                                                                                                                                       |
|-----------|-----------------------------------------------------------------------------------------------------------------------------------------------------------------------------------------------------------------------------------------------------------------------------------------------------------------------------------------------------------------------------------------------------------------------------------------------------------------------------------------------------------------------------------------------------------------------------------------------------------------------------------------------------------------------------------------------------------------------------------------------------------------------------------------------------------------------------------------------------------------------------------------------------------------------------------------------------------------------------------------------------------------------------------------------------------------------------------------------------------|
| PwNAC31   | TTGGTACATACATGTATGCGCGAGATTGGAAGAATGGGCTGCAAATCAGGACCAAACCTCTGCGCAGAT<br>CAATCTGCCCCCAGGTTTCAGGTTCTATCCACGGACGAGGAATTGATGGTGCATTACTTGTGTAAAAG<br>AGTGGCTTCACAGCCCTTCCAATTCCGATTATTGCAGAGATTGATTGTACAAGTTCGATCCGTGGCA<br>ACTACCCGAGAAGGCGTTATTTGGGGAGAAAGAATGGTACTTTTTTCAGTCCACGTGACAGAAAATACC<br>CAAATGGGTGCGTCCCACCGAGCTGCGGGATCTGGGTATTGGAAGGCTACTGGGACGGACAAACCT<br>GTTACTGCTGGACTGAACAGGATGAAGGTCGGGGTGAAAAAGGCTTTGGTTTTCTACAAGGGGAAG<br>GCTCCAGAGGTGTCAAGACCAATTGGATAATGCATGAATATCGTCTTGACAGACAGTGCCAGCAGGGC<br>TGCAAAGAGAAAAAGGAAGCATCAGGTTGGACGACTGGGTACTGTGTGCAATATATGAAAAGCACTAC<br>GCCAGTCAGAAGGCCGTGCCTAAAGAAAGCAATGAGTTATCATCATGCGTAGATCCAGAAGAAGATCA<br>ATATATGGCACCCGTTGCATCGAATTCCCCTCCAGACATGGACGATAACAAGCTGCTCATCAATCTGCCG<br>CGAATCAATTCCCTGAACAGAATAAACTCTCTTCTGAAATCCCCAGCAGGGAGATCATGAAGATGCCA<br>GACCCGAACATAACCAGACGGAGCAACAATATTTCCCGTGAGAAACAGATGCCGGTTCTAATTCCGG<br>AGGCCAGGCGATAGAATATGGTCAGAATCACCGTTCTGGAGAAACCAGCAATTCGGATACAACATATG<br>ATCAGATGGCGCAGAACCCGTTTCTCAACAGTTAGAGCATATGCCATCCTGGGAGCCAATTCTAGTG<br>CGTTTTTTGCAAGCCTGGCTGCAGAGCTCCTTTAG                          |
| DREB2A    | ATGGCAGTTTATGATCAGAGTGGAGATAGAAACAGAACACAAATTGATACATCGAGGAAAAGGA<br>AATCTAGAAGTAGAGGTGACGGTACTACTGTGGCTGAGAGATTAAAGAGATGGAAAGAGTATAA<br>CGAGACCGTAGAAGAAGTTTCTACCAAGAAGAGGAAAGTACCTGCGAAAGGGTCGAAGAAGGG<br>TTGTATGAAAGGTAAAGGAGGACCAGAGAATAGCCGATGTAGTTTCAGAGGAGTTAGGCAAAGG<br>ATTTGGGGTAAATGGGTTGCTGAGATCAGAGAGCCTAATCGAGGTAGCAGGCTTTGGCTTGGTAC<br>TTTCCCTACTGCTCAAGAAGCTGCTTCTGCTTATGATGAGGCTGCTAAAGCTATGTATGGTCCTTT<br>GGCTCGTCTTAATTTCCCTCGGTCTGATGCGTCTGAGGTTACGAGTACCTCAAGTCAGTCTGAGG<br>TGTGTACTGTTGAGACTCCTGGTTGTGTTTCATGTGAAAACAGAGGATCCAGATTGTGAATCTAAA<br>CCCTTCTCCGGTGGAGTGGAGCCGATGTATTGTCTGGAGAATGGTGCGGAAGAGATGAAGAGAG<br>GTGTTAAAGCGGATAAGCATTGGCTGAGCGAGTTTGAACATAACTATTGGAGTGATATTCTGAAA<br>GAGAAAGAGAAACAGAAGGAGCAAGGGATTGTAGAAACCTGTCAGCAACAACAGCAGGATTTCG<br>CTATCTGTTGCAGACTATGGTTGGCCCAATGATGTGGATCAGAGTCACTTGATTCTTCAGACATG<br>TTTGATGTCGATGAGCTTCTACGTGACCTAAATGGCGACGATGTGTTTGCAGGCTTAAATCAGGA<br>CCGGTACCCGGGAACAGTGTGCAACGGTTCATACAGGCCCGAGAGTCAACAAAGTGGTTTT<br>GATCCGCTACAAAGCCTCAACTACGGAATACCTCCGTTTCAGCTCGAGGGAAAGGATGGTAATGG<br>ATTCTTCGACGACTTGAGTTACTTGATCTGGAGAACTAA |
| ERD1      | ATGGAGGTGTTATCTACTTCCTCACCTCTAACGCTTCACTCCCACCGACTCCTCTCTGCTTCTTCTT<br>CTTCTTCACATGTCACCTCCATCGCCGCTTCTTCACTTTCTTCATTGCTTCTTCATATCTCGGAAT<br>CTCCCTTTCTAACCGCACGATCCACCGCTTCTCCACAACCTCCGACGAACTTAAGACGATTTCCCTC<br>AAAGAAAACGGAAGAAATTCATCCGATTTTCAGCGGTTTTCGAACGGTTCACCGAACGAGCGAT<br>CAGAGCTATAATCTTCTCTCAGAAGGAAGCTAAATCGTTGGGAAAAGATATGGTTTACACGCAGC<br>ATCTTCTCTTAGGTTTGATCGTGAGGATCGTGATCCTCAAGGCTTCCTTGATCCGGTATCACCA<br>TCGACAAGGCTCGTGAAGCTGTTTGGAGTATTTGGGACGAAGCTAATTCGATTTCGAAACAGGA<br>GGAAGCTTCTTCTACTTCGATTCAAAATCGACGGACATGCCTTTCTCTATCAGCACGAAACGAGT<br>CTTTGAAGCTGCGGTTGAGTACTCTAGGACTATGGATTGTCAATATATCGCACCGGAGCATATAGC<br>CGTTGGACTCTTCACCGTTGATGATGGTAGCGCCGGCAGAGTTCTCAAGAGATTGGGAGCAAATA                                                                                                                                                                                                                                                                                                                                                                                         |

|      |                                                                                                                                                                                                                                                                                                                                                                                                                                                                                                                                                                                                                                                                                                                                                                                                                                                                                                                                                                                                                                                                                                                                                                                                                                                                                                                                                                                                                                                                                                                                                                                                                                                                                                                                                                                                                                                                                                                                                                                                                                                                                                                                                                                                                                                                                                                                                                                                                                                                                        |
|------|----------------------------------------------------------------------------------------------------------------------------------------------------------------------------------------------------------------------------------------------------------------------------------------------------------------------------------------------------------------------------------------------------------------------------------------------------------------------------------------------------------------------------------------------------------------------------------------------------------------------------------------------------------------------------------------------------------------------------------------------------------------------------------------------------------------------------------------------------------------------------------------------------------------------------------------------------------------------------------------------------------------------------------------------------------------------------------------------------------------------------------------------------------------------------------------------------------------------------------------------------------------------------------------------------------------------------------------------------------------------------------------------------------------------------------------------------------------------------------------------------------------------------------------------------------------------------------------------------------------------------------------------------------------------------------------------------------------------------------------------------------------------------------------------------------------------------------------------------------------------------------------------------------------------------------------------------------------------------------------------------------------------------------------------------------------------------------------------------------------------------------------------------------------------------------------------------------------------------------------------------------------------------------------------------------------------------------------------------------------------------------------------------------------------------------------------------------------------------------------|
|      | <p> TGAATTTGCTCACAGCTGCAGCACTTACAAGACTTAAAGGAGAGATTGCTAAAGATGGAAGAGA<br/> GCCATCTTCTTCATCTAAAGGGAGCTTCGAGTCTCCTCCTAGTGGTCTGAATTGCTGGTTCTGGACC<br/> TGGTGGAAAAAAGCGAAAAATGTACTGGAACAGTTCTGTGTGGATCTGACAGCACGTGCTAGT<br/> GAGGGTCTTATTGATCCTGTTATTGGTCGGGAAAAAGAGGTTCAAAGAGTTATCCAGATACTTTG<br/> CCGCAGAACTAAAAACAACCCAATTCTTCTTGGTGAAGCTGGTGTGGGAAGACTGCCATTGCT<br/> GAAGGACTAGCGATTAGTATTGCAGAAGCCAGTGCTCCTGGATTTCTCTTGACGAAACGCATCAT<br/> GTCCCTGGATATAGGATTGCTAATGGCCGGTGCAAAAGAAAGGGGAGAGCTGGAGGCTCGAGTC<br/> ACTGCTTTGATAAGCGAGGTTAAAAAATCAGGTAAGGTCATTCTCTTCATAGATGAAGTGCATACA<br/> CTTATTGGGTCTGGCACAGTTGGAAGAGGGGAACAAAGGGTCTGGGCTTGACATTGCTAACCTCTT<br/> GAAACCATCACTTGAAGGGGTGAAC TTCAGTGCATTGCATCCACAACCCCTTGACGAATTTAGGA<br/> GTCAGTTTGAGAAGGACAAAGCCCTTGCAAGGAGATTCAGCCAGTGTGATTAACGAGCCAAG<br/> CGAGGAAGATGCGGTGAAGATTTTGTGGGCCTTCGTGAAAAATATGAAGCCCATCACAATTGCA<br/> AATATACTATGGAAGCCATAGATGCTGCAGTGTACCTTTCATCACGATATATCGCTGATAGATTTCT<br/> TCCAGATAAAGCTATTGATCTCATTGACGAGGCAGGAAGCAGAGCTCGTATTGAAGCTTTTAGGA<br/> AGAAAAAGGAGGATGCAATCTGTATCCTATCGAAGCCACCTAATGATTACTGGCAAGAGATCAAA<br/> ACAGTTCAGGCCATGCACGAAGTGTTCTCTCAAGCAGGCAAAAGCAGGATGACGGTGATGCCA<br/> TTTCAGATGAGTCTGGTGAAC TAGTTGAAGAGTCTTCTTTGCCACCTGCAGCAGGCGACGATGAG<br/> CCTATACTGGTGGGACCTGATGATATTGCAGCCGTTGCATCGGTTTGGTCTGGAATTCCAGTTCAG<br/> CAGATCACTGCAGATGAAAGAATGCTTCTTATGAGTCTAGAAGATCAGCTTAGAGGCAGAGTTGT<br/> TGGTCAAGATGAGGCGGTAGCTGCCATATCTAGAGCTGTGAAGAGGTCCCGGGTTGGCTTAAAA<br/> GATCCCGACCGTCCAATTGCTGCTATGCTTTTCTGTGGACCAACAGGGGTTGGAAAAACGGAGCT<br/> TACAAAAGCTCTGGCAGCAAATTATTTTGGCTCGGAAGAATCCATGCTGAGATTGGACATGAGTG<br/> AATACATGGAGCGTCATACTGTGAGCAAGCTGATAGGCTCTCCTCCTGGTTATGTTGGCTTTGAAG<br/> AAGGTGGAATGCTTACAGAAGCTATCAGGAGACGTCCTTTTACAGTGGTTTTGTTTCGATGAAATA<br/> GAGAAAGCACATCCGGATATCTCAATATTCTTCTCCAGCTGTTTCGAAGATGGCCATCTAACTGAT<br/> TCACAGGGAAGGAGAGTATCTTTTAAGAACGCATTGATCATAATGACCTCTAATGTCGGATCATTG<br/> GCCATTGCAAAGGGAAGACATGGTTCAATAGGGTTTATCCTCGATGATGATGAAGAGGCAGCATC<br/> TTATACCGGAATGAAAGCTTTGGTAGTCGAAGAACTCAAGAACTATTTCCGTCCAGAGTTGTTGA<br/> ACCGAATAGACGAAATCGTCATTTTCCGACAGCTAGAGAAGGCTCAGATGATGGAGATCTTGAAC<br/> CTGATGCTACAAGACTTGAAGTCGAGGCTCGTGGCACTCGGAGTTGGTTTAGAGGTGTCTGAAC<br/> CCGTCAAGGAGCTCATATGCAACAAGGCTATGATCCAGCTTACGGTGCACGACCACTCCGGAG<br/> AACTGTCACAGAGATTGTTGAAGATCCACTCAGTGAAGCCTTTCTTGCCGGGAGCTTCAAGCCTG<br/> GTGATACGGCTTTTGTAGTTCTTGATGATACCGGAAACCCATCGGTTCCGGACCAAAACCAGATTCTT<br/> CCACTATACGAGTTACAGACAAAACATCGATCGCATAG </p> |
| ABF3 | <p> ATGGGGTCTAGATTAAACTTCAAGAGCTTTGTTGATGGTGTGAGTGAGCAGCAGCCAACGGTGG<br/> GGACTAGTCTTCCATTGACTAGGCAGAACTCTGTGTTCTCGTTAACCTTTGATGAGTTTCAGAACT<br/> CATGGGGTGGTGGAAATTGGGAAAGATTTTGGGTCTATGAACATGGATGAGCTCTTGAAGAACATT<br/> TGGACTGCAGAGGAAAGTCATTCAATGATGGGAAACAATACCAGTTACACCAACATCAGCAATG<br/> GTAATAGTGGAACACTGTTATTAACGGCGGTGGTAACAACATTGGTGGGTTAGCTGTTGGTGTG<br/> GGAGGAGAAAGTGGTGGTTTTTCTACTGGTGGGAGTTTGCAGAGACAAGGTTCACTTACCTTGC<br/> CTCGGACGATTAGTCAGAAAAGGGTTGATGATGTCTGGAAGGAGCTGATGAAGGAGGATGACAT<br/> TGGAATGGTGTGTTAATGGTGGGACAAGCGGAATTCCGCAGAGGCAACAAACGCTGGGAGA<br/> GATGACTTTGGAGGAGTTTTTGGTCAGGGCTGGTGTGGTTAGGGAAGAACCTCAACCGGTGGAG<br/> AGTGTAACATAACTTCAATGGCGGATTCTATGGATTGGCAGTAATGGAGGTCTTGGGACAGCTAGT </p>                                                                                                                                                                                                                                                                                                                                                                                                                                                                                                                                                                                                                                                                                                                                                                                                                                                                                                                                                                                                                                                                                                                                                                                                                                                                                                                                                                                                                                                                                                                                                                                                                                                                                                                                                     |

|  |                                                                                                                                                                                                                                                                                                                                                                                                                                                                                                                                                                                                                                                                                                                                                                                              |
|--|----------------------------------------------------------------------------------------------------------------------------------------------------------------------------------------------------------------------------------------------------------------------------------------------------------------------------------------------------------------------------------------------------------------------------------------------------------------------------------------------------------------------------------------------------------------------------------------------------------------------------------------------------------------------------------------------------------------------------------------------------------------------------------------------|
|  | AATGGGTTTGTGCAAACCAACCTCAAGATTTGTCAGGAAATGGAGTAGCGGTGAGACAGGATC<br>TGCTGACTGCTCAAACCTCAGCCACTACAGATGCAGCAGCCACAGATGGTGCAGCAGCCACAGAT<br>GGTGCAGCAGCCGCAACAACCTGATACAGACGCAGGAGAGGCCTTTTCCCAAACAGACCCTATA<br>GCATTTTCCAACACTGTTGATGTGGTTAACCGTTCTCAACCTGCAACACAGTGCCAGGAAGTGAA<br>GCCTTCAATACTTGAATTCATAACCATCCTATGAACAACAATCTACTGCAAGCTGTCGATTTTAA<br>AACAGGAGTAACGGTTGCAGCAGTATCTCCTGGAAGCCAGATGTCACCTGATCTGACTCCAAAG<br>AGCGCCCTGGATGCATCTTTGTCCCCTGTTTCCTTACATGTTTGGGCGAGTGAGAAAAACAGGTGC<br>AGTTCTGGAGAAAGTGATTGAGAGAAGGCCAAAAAAGGATGATAAAGAATAGGGAATCAGCTGC<br>AAGATCCCGCGCTCGCAAGCAAGCTTATACGATGGAAGTGAAGCAGAAATTGCGCAACTCAAA<br>GAATTGAATGAAGAGTTGCAGAAGAAACAAGTTGAAATCATGAAAAGCAGAAAAATCAGCTTC<br>TGGAGCCTCTGCGCCAGCCATGGGGAATGGGATGCAAAAAGGCAATGCTTGCGAAGGACATTGAC<br>GGGTCCCTGGTAG |
|--|----------------------------------------------------------------------------------------------------------------------------------------------------------------------------------------------------------------------------------------------------------------------------------------------------------------------------------------------------------------------------------------------------------------------------------------------------------------------------------------------------------------------------------------------------------------------------------------------------------------------------------------------------------------------------------------------------------------------------------------------------------------------------------------------|

Supplementary Table S2. The promoter sequences used in the study.

| Gene Name | Promoter                                                                                                                                                                                                                                                                                                                                                                                                                                                                                                                                                                                                                                                                                                                                                                                                                                                                                                                                                                                                                                                                                                                                                                                                   |
|-----------|------------------------------------------------------------------------------------------------------------------------------------------------------------------------------------------------------------------------------------------------------------------------------------------------------------------------------------------------------------------------------------------------------------------------------------------------------------------------------------------------------------------------------------------------------------------------------------------------------------------------------------------------------------------------------------------------------------------------------------------------------------------------------------------------------------------------------------------------------------------------------------------------------------------------------------------------------------------------------------------------------------------------------------------------------------------------------------------------------------------------------------------------------------------------------------------------------------|
| PwNAC31   | GTGTGGAATTGTGAGCGGATAACAATTCACACAGGAAACAGCTATGACCATGATTACGCCAAGC<br>TTGCATGCCGGTAGAGGTGTGGTCAATAAGAGCGACCTCATGCTATACCTGAGAAAGCAACCTGA<br>CCTACAGGAAAGAGTTACTCAAGAATAAGAATTTTCGTTTTAAAACCTAAGAGTCACTTTAAAAT<br>TTGTATACACTTATTTTTTTTATWACTTATTTAATAATAAAAAATCATAAATCATAAGAAATTCGCCCCG<br>GAATTAGCTTGGCTGCAAGCGCGCAAAAAACCCCTCAAGACCCGTTTAGAGGCCCAAGGGGTT<br>ATGCTAGTTATGCGGCCGCTGCAGGTGCAGGATCCGCTGATGCTTCCTTTTCTCTTTCAGCCC<br>TGCTGGCACTGTCTGCAAGACGATATTCATGCATTATCCAATTGGTCTTGACACCTCTGGGAGCCT<br>TCCCCTTGTAAGAAAACCAAAGCCTTTTTCACCCCGACCTTCATCCTGTTCACTCCAGCAGTAACA<br>GGTTTGTCCGTCCAGTAGCCTTCCAATACCCAGATCCCGCAGCTCGGTTGGGACGCGACCCATT<br>TGGGTATTTTCTGTACGTGGACTGAAAAAGTACCATTCTTTCTCCCCAAATAACGCCTTCTCGGG<br>TAGTTGCCACGGATCGAACTTGTACAAATCAATCTCTGCAATAATCGGAATTGGAAAGGGCTGTG<br>AAGCCACTCTTTTACACAAGTAATGCACCATCAATTCTCGTCCGTGGGATAGAACCTGAAACCT<br>GGGGGCAGATTGATCTGCGCAGAGTTTGGTCTGATTGTCAGCCATTCTTCCAATCTCGCGCATT<br>GCCATGGCCATATGCAGGTCTCTCTGAGATCAGCTYSYKCTCCTCCATGATGGCGGCTCGCCCT<br>ATAGTGAGTCGTATTACAAATTCCGGCGATACAGTCAACTGTCTTTGACCTTTGTTACTACTCTCTT<br>CCGATGATGATGTCGCACTTATTCTATGCTGTCTCAATGTTAGAGGCATATCAGTCTCCACTGAAG<br>CCAATCTATCTGTGACGGCATCTTTATTCATTATCTTGTACAAATAATCCTGTTAAC |
| DREB2A    | ACAGAGAAGCAGGCTCCCATCTCTCATAGATTCTCAAATTCCTACCAGAGAGATTAATATACAAATTCCT<br>TTCCTAATGTTTTAGTTTATTAAGTGAAGGTGTGTGCACGATCATTGGGTTGACCACCAATCTTGGCATC<br>CAGTCATCTACGACTCGATCAAATATTTATGTTATTTTAAAAATGAACTGTAACCAAGATAACATTTTTTT<br>CATAAGGTCAACGACCCTTGGGATGTTAACAGAGCCAAGTTTAGTGAGCACTATGTGCTCGTTTTTCT<br>TAACACAATTCTAACGTGGTTTGGCCAAGCCAAGTCAACATTTTACTTACATCTCGTTTTCCAATAATGG<br>TTTTGTAATCGATAACCTAAATCATTGTAATGAATGCGTTCCTCCCTATCGATCCTAGGCCTTAGACAATG<br>CTGAATGATTCATAGCCACGCGAATAACCTATTCTACTAATATGAAAGAAAGAAGCCAAACTTACAG<br>AGCTCTTCTCACGGTCGTGCAAGAAAAGAGAGTCTACAGTCAGCAACAAAATTAGTGTTGCCATCATG                                                                                                                                                                                                                                                                                                                                                                                                                                                                                                                                                                                                    |

|      |                                                                                                                                                                                                                                                                                                                                                                                                                                                                                                                                                                                                                                                                                                                                                                                                                                                                                                                                                                                                                                                                                                                                                                                                                                                                                                                                                                                                                                                                                                                                                                                                                                                                                                                                                                                                                                                                                   |
|------|-----------------------------------------------------------------------------------------------------------------------------------------------------------------------------------------------------------------------------------------------------------------------------------------------------------------------------------------------------------------------------------------------------------------------------------------------------------------------------------------------------------------------------------------------------------------------------------------------------------------------------------------------------------------------------------------------------------------------------------------------------------------------------------------------------------------------------------------------------------------------------------------------------------------------------------------------------------------------------------------------------------------------------------------------------------------------------------------------------------------------------------------------------------------------------------------------------------------------------------------------------------------------------------------------------------------------------------------------------------------------------------------------------------------------------------------------------------------------------------------------------------------------------------------------------------------------------------------------------------------------------------------------------------------------------------------------------------------------------------------------------------------------------------------------------------------------------------------------------------------------------------|
|      | GCATCATCTTGAGCTTTTTCCGCACAAATAATTTATCATCCAAATGTTGTTCACTAAACCAAAAAACAAA<br>CAAGCATTACAGCGAAGAAACCAACTCGTAGATACAGATTTCCAAATTCATGCCTTATTTAGACCAATAA<br>AAACTGAAATTTCTCTTCAGCGAAAAAACAACAACTGAAATTTATATAGATCCAGAAGATAG<br>AAACTGTAGGCTCAATCGACTAGACTAGAAGATGCTCACCCGATCGTGCTTGAGATAGCGAGATAGTA<br>GCAACACCGACGGTAGAAATAAAATGGACGACACCCATCCAATGGGCTAATTTAGATTAAACGGGCTTT<br>AAGGGTTTGATAATGGATGTTAATTAAGTGGACATGGGATTGTATCACGTAGGCAATGGGTTTGAT<br>AATGGATGTTAAGTAACTAAGGCCCATGAGGTTGAAGTACGTAGGCAATTCGTGAGCTTACGTTAGC<br>GATGCCGTTAGAGACACGTAGTGGATGAAGTGGCTTTGGTTAGCAAAGGACACATGAGGCACATGCA<br>AAGGCTATAAATGACTGCTGCTTTGCTACAACTTGCGATTCCCAAATTTATAAGGTAATGGACCCTATC<br>ACCTCTGCTCGAAGCTAAGCCACCCAAGTTTGAGCTTCACCATTTGACACGTCTCTAGCTAATACTTAAT<br>GCTTAACTTTAACTAATACTTCATGTTTAAAGACATTTCTGGCTGACACATTTATGAATTCGCTCTATGT<br>CGTACGTACACCGGAAACCTTTAATTTTACAATATTAACCGTGATCTTTTTAAAAATATCTATATAACGAT<br>AAGTATCTCATCAAAACAAAATTGAATAATGTGCACGTTTGTAACCTAGAAAAACAGGCAATAAACA<br>TCATCATCCAATTACACATCTAGTAAGTGTGATGCAGTGGCAAACCTGGCAATAAACCAAGAAAAATCGA<br>GAAAGAGCAGATGAGACAGTGTGTGTGTGTCAGGGTTAATAAAAAAATGAAGATATTTAAAATT<br>TCATAATATTTAAATAATGAAGTAGTTTATGATCTTATCCATAAATCAATTTAAAAAGGTTAAACTTTA<br>CTTTCCGTATCAACAGCGTGTTCGAGAAGATTCGGGAGGACACTCGTCGAACGGAAAAGTCGTCTA<br>AGCCTTTATGTTCAATCAAAACTGACACGTAACCTTGCTCTCAACAGAAAAATAAAATAATGTTAG<br>AAAAATCTAGAGAAGGCTATAAATACTCCGTAGATACTTTGTCTTCCTT                                                                                                                                                                                                                                                                                                                                                                                                                                                                                    |
| ERD1 | TGGTCTTATGGAATCTCTCACTACTTTTTTAGAGGAAAATTTGTAAACGCAGAGACAACATTTTCCCG<br>AGAAAATGAGAGAATTTTCCGGGAAAATTTGATGTTATTCTTCTCTGAAAGTAAACGATCTCTCA<br>AGTAATTTTGTAGGAGAATGAGAAAATGGATTTCGTATAAATAGTGAAGAGAAGAGACGAGTAAAAG<br>AATTTGAATAAAGAAGAGAGACGTGGTTCGGACTTGCCCACTTTGTCATCTATGATGCAAAATAT<br>TTAACAAATAACAACTAATTGAGGTTGTAACGTGCATTTGTAATGCAATACATTGAGAAAAAACAATA<br>TTATACATAACAAAGTTGAGTTTTTTTCACTAGTTGTTTATTTAAGAATTAGAACAATAGTCCACTGTTTT<br>TTAACAAGTCCATAGCGAATGTTGGAACTTATTTAAAAAATTATTAATTGGAAGTCTAAAGAATTACG<br>AAAACAAATTGTATTTGATTAACAAAGTACAAATTGCATTTAAAAAGAAATAGTCTATAGAACATGGA<br>TGATCCTTCCATATAAAGTTTGATCATGCACATAGTATGACAATAATCAAAGAGCGGGGATAGCTGTGAA<br>TCTTTAGCAGCGAAAACCTTCAACATATATTTATGAATACAACAATGTTATAAATGAATTCGTACGAC<br>ATAATAAATGTTATAGTAATTCTTATGTTTGTCCAAAAAAGAAAGTAATCTTAGGTTAAATATATAAA<br>AACATGACAAAAGTGAATCTTAAAGATATTTGATGTACTACATATATATAACAAATTTATCAAAGATGT<br>ACATAGACAACTATGTTCTTAAACTCCACAAACATTACGGCAGTTAGAATTTAAATTTATCTTGGAATAT<br>TGTTTGTATATTATTAACAAATGTAAATTGGTGTAGGTTTTTTCAGATTTTCATAATGAAAACAGTTTAAATT<br>ATGGTTACGAGATAATTTGACGAATATGAATACATATATAGAAAATGTTTGGGCCTATATCTATGAAAAT<br>GTTTGGGCCTATCTATATCTATGAAAATTGTATGAGATACCAACAAAATAAAATATTTAAAGTAGCAAAAC<br>ATTGTGTTACTTTTCTATTATCTTGCTTAAATAAAATAAAATCAATTTTTTTTTTAAGAAGTAACACAATG<br>TGAAGAATACGTGTGTACTTTTTTTTTTTTGGCGTAAATAAAATAGTAAATTAAGACAAGATTAATAGA<br>AAAGTACACACGTATTCTTCCATTGTACGTTAAAAAGCTCGTGAATTCATGCATGAGGACGATTTG<br>GGTAACCAATAAGTTGACTATATTTTGTATGCTTTCTATTTTCTTCACATGGAAAGAATTTCCAACG<br>AAAAGTTGAAGGGGAGACAATTAGGAACACTAAATTGTCACCATTAGGCTCTTAAGTTTTAATTTGGC<br>AACCAATTCATTTTCTATTCTGTATTTTGGATTGGGACCGTTTATTTGTTGTGTGTGTGCAACTT<br>GAGCTCTTCTCTGTAACACGCATGTGTTGCGTTTGGTTTTAATTTATTTGCCTACTTTTGCCTTTTCAA<br>CGTTTGTACCACATTTGAACTATAAAGTCCAATCCATACCGATCCTTACAACCATATAAATGTGCTAC<br>AACAAAAGTTAATCTTTGATCTTGATCAACTCAAAGATGACTATACATGATTAGTTCTCCTAAAAGCTAAT |

|      |                                                                                                                                                                                                                                                                                                                                                                                                                                                                                                                                                                                                                                                                                                                                                                                                                                                                                                                                                                                                                                                                                                                                                                                                                                                                                                                                                                                                                                                                                                                                                                                                                                                                                                                                                                                                                                                                                                                                                                                                                                                                                                                                               |
|------|-----------------------------------------------------------------------------------------------------------------------------------------------------------------------------------------------------------------------------------------------------------------------------------------------------------------------------------------------------------------------------------------------------------------------------------------------------------------------------------------------------------------------------------------------------------------------------------------------------------------------------------------------------------------------------------------------------------------------------------------------------------------------------------------------------------------------------------------------------------------------------------------------------------------------------------------------------------------------------------------------------------------------------------------------------------------------------------------------------------------------------------------------------------------------------------------------------------------------------------------------------------------------------------------------------------------------------------------------------------------------------------------------------------------------------------------------------------------------------------------------------------------------------------------------------------------------------------------------------------------------------------------------------------------------------------------------------------------------------------------------------------------------------------------------------------------------------------------------------------------------------------------------------------------------------------------------------------------------------------------------------------------------------------------------------------------------------------------------------------------------------------------------|
|      | GTTGTAGAGTGCAATTGCCGACAAACCTCCAAGTTTTGTGTCAACTTGAATTTGTA                                                                                                                                                                                                                                                                                                                                                                                                                                                                                                                                                                                                                                                                                                                                                                                                                                                                                                                                                                                                                                                                                                                                                                                                                                                                                                                                                                                                                                                                                                                                                                                                                                                                                                                                                                                                                                                                                                                                                                                                                                                                                      |
| ABF3 | AAACTCTCTCTTTTTTGTAAAAAAGGTTATATATCTTTAACCTTCTAGGATTTAGCCTAGCTGAAAA<br>AAAGTTACACATTAAACTTGTTTTGTTAACAACGTTTAGCATTTGCGTTGTGTGTTGTTCTTCCGGT<br>TGTTATAGTTTCGTACTTCGTTGGTTTTGAGTTTTGGATTCTTGAAAGGTGGTTATAATTTATACATTTT<br>GTTTCTACACGACCTTAAAGAAGTAACCTCAATTAATTAATCTAATTCGGGAAAGAGCACGTCTCAAA<br>AGAGTCGTCGAGTCCCATGTGAATTCTATATGATAACATTAAACAAAATCACGGTTCATATTTGTTTAAT<br>ACTAGTATGTATTGCAGAGTAGACTTTCCTAATCCAGTAGATTCTTAAAGAAAAATAATATAAAAGAT<br>TGAAAATAGAAATAAAAGATGGGAGACACGAAGGGTCACTTGATTGTACCGAGTCCAAATGTAAAGA<br>AGTCTCAATAATGGTGAATAAAATAAAGAAGTTGAAGACAAGATCACAATCACCATGTGAAGATCAAC<br>ACACAAGATCATAATTTTATTGTATGTTTGCTTCATTTCAACTTTTTTAAATATTGTTAAGAGGGCAGGCA<br>TTGAGTGCGCCACGTGGCAAATGACCATCCCTTTGTAGGTGCAGCAAACGTGATAAAGATTCCGGACT<br>GTTCACCCATTCCCTTCTCCATTTGTTTCTATTTTTCTTACAAATCTTATCGTATCATAATTTTTTTTCCA<br>TAATGCGCTCCCTTGAATGGAATAACGTTGGTTATTTTGTTCACCAAAATTTTCATACCATTCGATCAA<br>ATAGGTGCATCAACTTACAAGAAATGAAAGTGTGATCCCTATTTTATTAGGTAGCTAAGTAAGTGTTAGT<br>GAACACTACGTTAGATTGTTACTCAAATAACGGATCAACGAATCTCGTATTCATTACTATACTGCTAATGA<br>ATGCATCAATTTTAATTTTATTGGTTATCTATCTTAAAAAAGTTATAAGAATATTTTGATAATTTGTTT<br>CAAGATGTAGTACTAGTAGTAGTACTTGGTCTCGTAAACGACGACGCCGTTTAGGAAATCAAACGGCC<br>AAAAATGCTTCCACTTTGCGAAATTTTATTGGTGGGAAACGCAAATGTATCGATAATGATTTAAAGAAA<br>AAGCGGCGTTTCTAATTGGACCACGTTGCCAATCTCTACGGCTCACGCACGATCTGACGTCAAATTGG<br>CATAATACTATAATAACCTTATCGAGAATAAAATAATAGTCGCATCCAAACAAAAGAAACCAACCCTTTTA<br>TATCACGACGAGTGTACGCCATGGACACTTGTCATCTCTCGCTCTGACCCCTTCAGGTATCTTTTA<br>TTTCTCAAAGAGGAATTATTGATTTTCCATTTCAAAGAAAAAATAAATTCGAAGGTCAGGAAAATT<br>AACAAAAAACTTCCTTTTTTTTTTTGTTAGTTTGTGTGACTGAGCTGCTTCATTTTTTTCTTTCTTTTTT<br>TTTTTGGTTTGATGAATCGATTTTGTGTCTATTACTGATTGGTTTTCTTGTTTCTGATTCTGATTCTGA<br>AGAGAATCATGATTTTTTTTTTCCGCTGAATAATAAGCATATGATTGGGTGTTTTGGAGATTGTTTACT<br>GATTAAAAGGAGATTCTTTCCATTTTACCATTGCTCTGTTTGACTTCATTGTGCTTATATTTCAATTAG<br>ATCTTTTGTGTTGGGTTTAGCTTTGGAAGTATAAAATCTGATTTGTCTCACGGCTTTGGATTGGTTC<br>TTAAATTTTGGTACTTTAAACTGGATAAAGATCAGTGCTTTTTTAGATTCTCGTTTGTGATGAATTTA<br>TGGATGTATGTATAATTAACCATAATCTCTGCTTGTGTTTCTTATAGGTAAATATCCAGAAGCTTG<br>ATCCTCCTAGTTGTACGAAAGCTTGAGTA |

**Supplementary Table S3. PCR primers used in this study**

| Gene Name | Gene No.  |         | Sequences(5' to 3')    |
|-----------|-----------|---------|------------------------|
| PwNAC31   |           | Forward | TCCGAGCTTTTGTCTTTGTTT  |
|           |           | Reverse | AGAGCAGAGCAGAATGAATGA  |
| ABF3      | AT4G34000 | Forward | GATGTGGTTAACCGTTCTCAAC |
|           |           | Reverse | CAGCTTGCAGTAGATTGTTGTT |
| DREB2A    | AT5G05410 | Forward | CATGTTTGATGTCGATGAGCTT |
|           |           | Reverse | ATTCCGTAGTTGAGGCTTTGTA |
| ERD1      | AT5G51070 | Forward | CTTTCTCTATCAGCACGAAACG |

|             |         |                             |
|-------------|---------|-----------------------------|
|             | Reverse | CGGTGCGATATATTGACAATCC      |
| PwNAC31-pro | Forward | GTGTGGAATTGTGAGCGGAT        |
|             | Reverse | GTTAACAGGATTATTTGTACAA      |
| DREB2A-pro  | Forward | TTTCAACAAATCATCTCGTCTTG     |
|             | Reverse | CATCTCCTTCCCAGAAACAA        |
| ERD1-pro    | Forward | AGTGAAGAGAAGAGACGAGTAAAAGAA |
|             | Reverse | GATCGAATTCGTCTCGTCCGT       |

Supplementary Table S4. Primers for vectors' construction in this study

| Gene Name                    |         | Sequences(5'to3')                 |
|------------------------------|---------|-----------------------------------|
| <i>ERD1pro</i> -KpnI-pAbAi-F | Forward | TTCGAGCTCGGTACCAATTTGAATAAAGAAGAG |
| <i>ERD1pro</i> -Sall-pAbAi-R | Reverse | TGCCTCGAGGTCGACAGGAAGTAGATAACACCT |
| <i>PwNAC31</i> -NdeI-AD-F    | Forward | GATTACGCTCATATGATGCGCGAGATTGGAA   |
| <i>PwNAC31</i> -EcoRI-AD-R   | Reverse | ACCCGGGTGGAATTCCTAAAGGAGCTCTGCA   |
| <i>DREB2A</i> -AD-NdeI-F     | Forward | GATTACGCTCATATGATGGCAGTTTATGAT    |
| <i>DREB2A</i> -AD-EcoRI-R    | Reverse | ACCCGGGTGGAATTCTTAGTTCTCCAGATC    |
| <i>ABF3</i> -AD-NdeI-F       | Forward | GATTACGCTCATATGATGGGGTCTAGATTA    |
| <i>ABF3</i> -AD-EcoRI-R      | Reverse | ACCCGGGTGGAATTCCTACCAGGGACCCGT    |
| p0800- <i>ERD1</i> -KpnI-F   | Forward | GGCGAATTGGGTACCAATTTGAATAAAGAAGAG |
| p0800- <i>ERD1</i> -Sall-R   | Reverse | ATCGATACCGTCGACAGGAAGTAGATAACACCT |
| SK- <i>PwNAC31</i> -BamHI-F  | Forward | AGAACTAGTGGATCCATGCGCGAGATTGGAA   |
| SK- <i>PwNAC31</i> -Sall-R   | Reverse | CCCCTCGAGGTCGACCTAAAGGAGCTCTGCA   |
| SK- <i>DREB2A</i> -BamHI-F   | Forward | AGAACTAGTGGATCCATGGCAGTTTATGAT    |
| SK- <i>DREB2A</i> -Sall-R    | Reverse | CCCCTCGAGGTCGACTTAGTTCTCCAGATC    |
| SK- <i>ABF3</i> -BamHI-F     | Forward | AGAACTAGTGGATCCATGGGGTCTAGATTA    |
| SK- <i>ABF3</i> -Sall-R      | Reverse | CCCCTCGAGGTCGACCTACCAGGGACCCGT    |
| <i>PwNAC31</i> -AD-NdeI-F    | Forward | GATTACGCTCATATGATGCGCGAGATTGGAA   |
| <i>PwNAC31</i> -AD-EcoRI-R   | Reverse | ACCCGGGTGGAATTCCTAAAGGAGCTCTGCA   |
| <i>DREB2A</i> -BD-NdeI-F     | Forward | GAGGACCTGCATATGATGGCAGTTTATGATCAG |
| <i>DREB2A</i> -BD-Sall-R     | Reverse | CCGCTGCAGGTCGACTTAGTTCTCCAGATC    |
| <i>ABF3</i> -NdeI-BD-F       | Forward | GAGGACCTGCATATGATGGGGTCTAGATTAAAC |

|                         |         |                                      |
|-------------------------|---------|--------------------------------------|
| <i>ABF3</i> -SalI-BD-R  | Reverse | CCGCTGCAGGTCGACCTACCAGGGACCCGTC      |
| <i>RHA2A</i> -NdeI-BD-F | Forward | GAGGACCTGCATATGATGGGGCTACAAGGT       |
| <i>RHA2A</i> -SalI-BD-R | Reverse | CCGCTGCAGGTCGACTCAGTGGAGAGAGAA       |
| <i>ZFHD</i> -NdeI-BD-F  | Forward | TAAAATGCGACACTACGTTTAC               |
| <i>ZFHD</i> -SalI-BD-R  | Reverse | CAGCTTTGTTGGAACATACCA                |
| PwNAC31-1300-F          | Forward | CGCGGATCCATGCGCGAGATTGGAAGAATGGGC    |
| PwNAC31-1300-R          | Reverse | CGGGGTACCAAGGAGCTCTGCAGCCAGGCTTG     |
| PwNAC31-1205-F          | Forward | CCATCGATATGCGCGAGATTGGAAGAATG        |
| PwNAC31-1205-R          | Reverse | CGGGGTACCCTAAAGGAGCTCTGCAGCCA        |
| PwNAC31-N-BD-F          | Forward | CATGCCATGGCAATGCGCGAGATTGGAAGAATG    |
| PwNAC31-N-BD-R          | Reverse | CGCGGATCCGCCTGATGCTTCCTTTTCTCTTTGC   |
| PwNAC31-C-BD-F          | Forward | CATGCCATGGCAATCAGGTTGGACGACTGGGTACTG |
| PwNAC31-C-BD-R          | Reverse | CGCGGATCCGCTAAAGGAGCTCTGCAGCCA       |
| PwNAC31-BD-F            | Forward | CCGGAATTCATGAGTTTATCAGTAAATGGG       |
| PwNAC31-BD-R            | Reverse | AACTGCAGATTACTTTACGAAGTTCCATAAATC    |
| GFP-F                   | Forward | GTCCAACACGTCTCAAAGCAAG               |
| GFP-R                   | Reverse | TCCATGCCGAGAGTGATCCC                 |

**Supplementary Table S5. qRT-PCR primers used in this study**

| Gene Name    |         | Sequences(5' to 3')      |
|--------------|---------|--------------------------|
| PwNAC31-RT-F | Forward | CAACCAGACGGAGCAACAATATTC |
| PwNAC31-RT-R | Reverse | GTTCTGCGCCATCTGATCATAGTT |
| ABF3-RT-F    | Forward | GATGTGGTTAACCGTTCTCAAC   |
| ABF3-RT-R    | Reverse | CAGCTTGCAGTAGATTGTTGTT   |
| NCED3-RT-F   | Forward | GATGAATTTGTTCCAGAGAGCG   |
| NCED3-RT-R   | Reverse | AACACTAGGATCAGCCGTTTTA   |
| DREB2A-RT-F  | Forward | CATGTTTGATGTCGATGAGCTT   |
| DREB2A-RT-R  | Reverse | ATTCCGTAGTTGAGGCTTTGTA   |
| ABI5-RT-F    | Forward | AATAAGAGAGGGATAGCGAACG   |
| ABI5-RT-R    | Reverse | GCTACCACCACCTCTATGTATC   |



|               |         |                         |
|---------------|---------|-------------------------|
| RD29A-RT-F    | Forward | TTCTGTAAGGACGACGTTTACA  |
| RD29A-RT-R    | Reverse | CGTACTCGTTACATCCTCTGTT  |
| ERD1-RT-F     | Forward | CTTTCTCTATCAGCACGAAACG  |
| ERD1-RT-R     | Reverse | CGGTGCGATATATTGACAATCC  |
| PwEF1-RT-F    | Forward | AACTGGAGAAGGAACCCAAG    |
| PwEF1-RT-R    | Reverse | AACGACCCAATGGAGGATAC    |
| ATNAC072-RT-F | Forward | GATCCGTTAGCCCAGTTGAGT   |
| ATNAC072-RT-R | Reverse | TAGCCTGCAACTTTCCGACAT   |
| ACTIN-RT-F    | Forward | GGTAACATTGTGCTCAGTGGTGG |
| ACTIN-RT-R    | Reverse | AACGACCTTAATCTTCATGCTGC |

---
